# Supplementary material
Source: PubMed Central journal article supplement (PMC3625264)
Supplement: 1219686110_pnas.201219686SI.pdf [file 1219686110_pnas.201219686SI.pdf]

# Supporting Information

Step toe et al. 10.1073/pnas.1219686110

**Table S1. Cox regression for mortality in the fully adjusted model**

| Factor                              | Adjusted hazard ratio | P value |
|-------------------------------------|-----------------------|---------|
| Social isolation                    | 1.26 (1.08–1.48)      | 0.004   |
| Sex (male)                          | 0.58 (0.50–0.67)      | <0.001  |
| Age, years <60                      | 1 (reference)         |         |
| 60–69                               | 2.44 (1.82–3.27)      | <0.001  |
| 70–79                               | 6.73 (5.09–8.90)      | <0.001  |
| 80+                                 | 17.91 (13.44–23.86)   | <0.001  |
| Education                           |                       |         |
| No qualifications                   | 1 (reference)         |         |
| Intermediate                        | 1.14 (0.93–1.39)      | 0.21    |
| Higher education                    | 1.10 (0.90–1.34)      | 0.35    |
| Ethnicity (white)                   | 0.40 (0.15–1.08)      | 0.072   |
| Wealth                              |                       |         |
| 1 (lowest)                          | 1 (reference)         |         |
| 2                                   | 0.88 (0.73–1.07)      | 0.20    |
| 3                                   | 0.66 (0.54–0.82)      | <0.001  |
| 4                                   | 0.79 (0.64–0.98)      | 0.030   |
| 5 (highest)                         | 0.70 (0.55–0.88)      | 0.002   |
| Marital status (unmarried)          | 1.13 (0.96–1.33)      | 0.15    |
| Limiting long-standing illness      | 1.85 (1.60–2.15)      | <0.001  |
| Cancer                              | 2.64 (2.09–3.34)      | <0.001  |
| Diabetes                            | 0.86 (0.68–1.09)      | 0.21    |
| Coronary heart disease              | 1.33 (1.04–1.70)      | 0.025   |
| Chronic lung disease                | 1.05 (0.71–1.56)      | 0.81    |
| Stroke                              | 1.18 (0.91–1.53)      | 0.22    |
| Arthritis                           | 0.78 (0.68–0.90)      | 0.001   |
| Mobility impairment                 | 1.55 (1.29–1.86)      | <0.001  |
| Diagnosed depressive illness        | 1.39 (0.87–2.23)      | 0.17    |
| Depressive symptoms above threshold | 1.25 (1.07–1.47)      | 0.006   |
| Loneliness                          | 0.91 (0.77–1.08)      | 0.28    |

**Table S2. Association between social isolation and mortality in survivors for 24 mo or more**

| Model | Covariates                                                                    | Social isolation |         |
|-------|-------------------------------------------------------------------------------|------------------|---------|
|       |                                                                               | HR (95% C.I.)    | P value |
| 1     | Isolation + age + sex                                                         | 1.54 (1.31–1.81) | <0.001  |
| 2     | Isolation + age + sex + demographic factors*                                  | 1.37 (1.15–1.64) | <0.001  |
| 3     | Isolation + age + sex + demographic factors* + health indicators <sup>†</sup> | 1.32 (1.11–1.58) | 0.002   |
| 4     | Model 3 + loneliness                                                          | 1.33 (1.11–1.59) | 0.002   |

\*Demographic factors are wealth, education, marital status, and ethnicity.

<sup>†</sup>Health indicators are limiting long-standing illness, mobility impairment, cancer, diabetes, coronary heart disease, chronic lung disease, arthritis, stroke, diagnosed depression, and Centre for Epidemiologic Studies Depression Scale rating.

**Table S3. Logistic regression on mortality in fully adjusted model**

| Factor                              | Adjusted odds ratio | P value |
|-------------------------------------|---------------------|---------|
| Social isolation                    | 1.26 (1.13–1.41)    | <0.001  |
| Loneliness                          | 1.00 (0.94–1.06)    | 0.89    |
| Sex (male)                          | 0.53 (0.44–0.63)    | <0.001  |
| Age, years <60                      | 1 (reference)       |         |
| 60–69                               | 2.51 (1.85–3.42)    | <0.001  |
| 70–79                               | 8.04 (6.00–10.81)   | <0.001  |
| 80+                                 | 29.55 (21.40–40.82) | <0.001  |
| Education                           |                     |         |
| No qualifications                   | 1 (reference)       |         |
| Intermediate                        | 0.95 (0.79–1.15)    | 0.61    |
| Higher education                    | 0.89 (0.70–1.13)    | 0.34    |
| Ethnicity (white)                   | 0.35 (0.12–1.05)    | 0.060   |
| Wealth                              |                     |         |
| 1 (lowest)                          | 1 (reference)       |         |
| 2                                   | 0.81 (0.63–1.03)    | 0.089   |
| 3                                   | 0.59 (0.45–0.76)    | <0.001  |
| 4                                   | 0.74 (0.57–0.97)    | 0.028   |
| 5 (highest)                         | 0.61 (0.46–0.81)    | 0.001   |
| Marital status (unmarried)          | 1.28 (1.06–1.54)    | 0.011   |
| Limiting long-standing illness      | 2.07 (1.72–2.49)    | <0.001  |
| Cancer                              | 3.78 (2.69–5.32)    | <0.001  |
| Diabetes                            | 0.80 (0.59–1.07)    | 0.14    |
| Coronary heart disease              | 1.52 (1.09–2.12)    | 0.015   |
| Chronic lung disease                | 1.03 (0.60–1.74)    | 0.95    |
| Stroke                              | 1.16 (0.80–1.69)    | 0.44    |
| Arthritis                           | 0.75 (0.63–0.90)    | 0.002   |
| Mobility impairment                 | 1.63 (1.32–2.02)    | <0.001  |
| Diagnosed depressive illness        | 1.30 (0.69–2.44)    | 0.41    |
| Depressive symptoms above threshold | 1.22 (0.99–1.51)    | 0.060   |
